# Supplementary material for: Functional genetic characterization of salivary gland development in Aedes aegypti
Source: PubMed Central journal article supplement (PMC3599648; doi:10.1186/2041-9139-4-9), 2013-03-06
Supplement: 2041-9139-4-9-S1.pdf [file 2041-9139-4-9-S1.pdf]

| <b>Associated Gene Name</b> | <b>Description</b>                                  | <b>Dmel Gene ID</b> | <b>Aae Gene ID</b> | <b>Orthology Type</b> |
|-----------------------------|-----------------------------------------------------|---------------------|--------------------|-----------------------|
| <i>betaCop</i>              | coatomer beta subunit                               | FBgn0008635         | AAEL004546         | 1 to 1                |
| <i>cdc2</i>                 | cell cycle regulator                                | FBgn0004106         | AAEL008621         | 1 to 1                |
| <i>crebA</i>                | cyclic AMP response element binding protein         | FBgn0004396         | AAEL000402         | 1 to 1                |
| <i>da</i>                   | transcriptional regulator                           | FBgn0000413         | AAEL010226         | 1 to 1                |
| <i>GlcAT-P</i>              | glucuronosyltransferase                             | FBgn0036144         | AAEL006254         | 1 to 1                |
| <i>Hnf4</i>                 | transcriptional regulator                           | FBgn0004914         | AAEL011323         | 1 to 1                |
| <i>l(2)k01209/ucdk1</i>     | uridine cytidine kinase                             | FBgn0022029         | AAEL011273         | 1 to 1                |
| <i>Manf</i>                 | molecular function unknown                          | FBgn0027095         | AAEL007286         | 1 to 1                |
| <i>MBD-like</i>             | transcriptional regulator                           | FBgn0027950         | AAEL001033         | 1 to 1                |
| <i>paps</i>                 | adenylylsulfate kinase; sulfate adenylyltransferase | FBgn0020389         | AAEL005605         | 1 to 1                |
| <i>sage</i>                 | transcriptional regulator                           | FBgn0037672         | AAEL003613         | 1 to 1                |
| <i>sar1</i>                 | COPII component                                     | FBgn0038947         | AAEL010012         | 1 to 1                |
| <i>sec24</i>                | COPII component                                     | FBgn0033460         | AAEL001273         | 1 to 1                |
| <i>sec63</i>                | ER translocon                                       | FBgn0035771         | AAEL007987         | 1 to 1                |
| <i>sec71</i>                | ER translocon                                       | FBgn0028538         | AAEL013012         | 1 to 1                |
| <i>spase22-23</i>           | signal peptidase complex component                  | FBgn0039172         | AAEL000947         | 1 to 1                |
| <i>srp54</i>                | signal recognition particle                         | FBgn0024285         | AAEL011568         | 1 to 1                |
| <i>syx18</i>                | SNAP receptor encoding gene                         | FBgn0039212         | AAEL004426         | 1 to many             |
| <i>TRAM</i>                 | ER translocon                                       | FBgn0040340         | AAEL003285         | 1 to 1                |

**Additional File 1. *D. melanogaster* salivary gland marker orthologs in *Ae. aegypti*.** *Ae. aegypti* orthologs of *D. melanogaster* salivary gland marker genes were identified. The associated gene names, identification numbers in *D. melanogaster* and *Ae. aegypti*, orthology relationships, and gene descriptions (Abrams and Andrew, 2005; McQuilton et al., 2012) are indicated. In this investigation, expression of the *Ae. aegypti* orthologs was assessed during mosquito salivary gland development.
