# Supplementary material for: Functional genetic characterization of salivary gland development in Aedes aegypti
Source: PubMed Central journal article supplement (PMC3599648; doi:10.1186/2041-9139-4-9), 2013-03-06
Supplement: 2041-9139-4-9-S2.pdf [file 2041-9139-4-9-S2.pdf]

**Additional File 2. CRE sites in the 5' flanking sequences of *Ae. aegypti* secretory pathway genes.**

| Dmel Gene ID | Aae Gene ID | Orthology Type | Gene Name          | Sequences           | Strand | Distance to ORF |
|--------------|-------------|----------------|--------------------|---------------------|--------|-----------------|
| FBgn0038947  | AAEL010012  | 1 to 1         | <i>sar1</i>        | T T G A C G T T T A | For    | 500-2000 bp     |
|              |             |                |                    | T T G A C G T G G A | For    | 500-2000 bp     |
|              |             |                |                    | T T G A C G T T T G | For    | 500-2000 bp     |
|              |             |                |                    | A G G A C G T T T T | For    | 500-2000 bp     |
|              |             |                |                    | T T G A C G T T T C | Rev    | <500 bp         |
| FBgn0024285  | AAEL011568  | 1 to 1         | <i>srp54</i>       | T C G A C G T T T T | For    | 500-2000 bp     |
|              |             |                |                    | C T T A C G T T G T | Rev    | <500 bp         |
| FBgn0028538  | AAEL013012  | 1 to 1         | <i>sec71</i>       | T T G A C G T G T G | Rev    | 500-2000 bp     |
| FBgn0033460  | AAEL001273  | 1 to 1         | <i>sec24</i>       | A G G A C G T T A G | Rev    | 500-2000 bp     |
|              |             |                |                    | G T G A C G T T G C | For    | 500-2000 bp     |
| FBgn0039172  | AAEL000947  | 1 to 1         | <i>spase 22-23</i> | A T T A C G T G T T | For    | <200 bp         |
|              |             |                |                    | A C T A C G T G G A | Rev    | 500-2000 bp     |
|              |             |                |                    | G C T A C G T T T C | For    | <100 bp         |
| FBgn0037672  | AAEL003613  | 1 to 1         | <i>sage</i>        | T T G A C G T T T C | Rev    | 500-2000 bp     |
|              |             |                |                    | G C T A C G T T G G | For    | 500-2000 bp     |
|              |             |                |                    | A T G A C G T T A A | Rev    | 500-2000 bp     |
| FBgn0086357  | AAEL010716  | 1 to many      | <i>sec61α</i>      | T C T A C G T T G C | Rev    | 500-2000 bp     |
|              |             |                |                    | C G T A C G T T A T | For    | 500-2000 bp     |
|              |             |                |                    | T T T A C G T G T A | For    | <500 bp         |
|              |             |                |                    | A C G A C G T T T T | For    | <500 bp         |
|              |             |                |                    | G T G A C G T G A A | Rev    | <500 bp         |
|              |             |                |                    | C T G A C G T T T C | Rev    | <500 bp         |
| FBgn0086357  | AAEL004523  | 1 to many      | <i>sec61α</i>      | T T A C G T T A A G | Rev    | 500-2000 bp     |
|              |             |                |                    | C G T A C G T T A C | Rev    | 500-2000 bp     |
|              |             |                |                    | C C G A C G T T G A | For    | 500-2000 bp     |
|              |             |                |                    | A G G A C G T G G C | For    | 500-2000 bp     |
|              |             |                |                    | G T G A C G T G A A | Rev    | <500 bp         |
|              |             |                |                    | A T G A C G T G T C | Rev    | <500 bp         |
|              |             |                |                    | T G G A C G T T C C | Rev    | <500 bp         |
| FBgn0035827  | AAEL015236  | 1 to many      | <i>srp9</i>        | T T T A C G T C T C | Rev    | 500-2000 bp     |
|              |             |                |                    | C T G A C G T T T C | For    | <100 bp         |
| FBgn0035827  | AAEL012049  | 1 to many      | <i>srp9</i>        | G A G A C G T T T C | For    | 500-2000 bp     |
|              |             |                |                    | T G T A C G T T T C | For    | 500-2000 bp     |
|              |             |                |                    | C T G A C G T T T C | Rev    | 500-2000 bp     |
| FBgn0011509  | AAEL009829  | 1 to 1         | <i>srpRβ</i>       | C G G A C G T A A T | For    | <500 bp         |
| FBgn0035947  | AAEL010060  | 1 to 1         | <i>srp68</i>       | T T G A C G T G T T | For    | <500 bp         |
|              |             |                |                    | G C G A C G T G G T | Rev    | 500-2000 bp     |
|              |             |                |                    | T T G A C G T T C G | Rev    | 500-2000 bp     |
| FBgn0037357  | AAEL007484  | 1 to 1         | <i>sec23</i>       | G T G A C G T G T T | Rev    | 500-2000 bp     |
|              |             |                |                    | C T G A C G T G T T | Rev    | 500-2000 bp     |
|              |             |                |                    | T T T A C G T G T C | Rev    | <100 bp         |
| FBgn0038808  | AAEL001177  | 1 to 1         | <i>srp14</i>       | T T G A C G T G C T | Rev    | 500-2000 bp     |
|              |             |                |                    | T T G A C G T G C T | Rev    | 500-2000 bp     |
|              |             |                |                    | T T G A C G T G C T | Rev    | 500-2000 bp     |
| FBgn0038810  | AAEL003377  | 1 to 1         | <i>srp72</i>       | C G T A C G T G C A | For    | 500-2000 bp     |
|              |             |                |                    | T T G A C G T T G T | Rev    | 500-2000 bp     |
|              |             |                |                    | T T G A C G T T T C | Rev    | 500-2000 bp     |
| FBgn0024509  | AAEL012240  | 1 to 1         | <i>sec13</i>       | T T G A C G T T T A | For    | 500-2000 bp     |
|              |             |                |                    | T T G A C G T G G A | For    | 500-2000 bp     |
|              |             |                |                    | T T G A C G T T T A | Rev    | <500 bp         |
| FBgn0040623  | AAEL004603  | 1 to 1         | <i>spase12</i>     | T T G A C G T T C G | For    | 500-2000 bp     |

| Dmel Gene ID | Aae Gene ID | Orthology Type | Gene Name      | Sequences                                                                                                       | Strand                          | Distance to ORF                                                 |
|--------------|-------------|----------------|----------------|-----------------------------------------------------------------------------------------------------------------|---------------------------------|-----------------------------------------------------------------|
| FBgn0040623  | AAEL004603  | 1 to 1         | <i>spase12</i> | A T G A C G T T T C<br>G T G A C G T T T A                                                                      | For<br>Rev                      | <500 bp<br>500-2000 bp                                          |
| FBgn0029709  | AAEL000208  | 1 to many      | <i>CHOp24</i>  | T T G A C G T T T G                                                                                             | Rev                             | 500-2000 bp                                                     |
| FBgn0030306  | AAEL003418  | 1 to 1         | <i>spase25</i> | G C G A C G T G T C<br>T T G A C G T T T G<br>G G A C G T G C T A                                               | For<br>Rev<br>Rev               | <200 bp<br><500 bp<br><500 bp                                   |
| FBgn0031049  | AAEL005471  | 1 to many      | <i>sec61γ</i>  | A T G A C G T T G C<br>C C G A C G T G G A                                                                      | For<br>For                      | <100 bp<br><100 bp                                              |
| FBgn0010638  | AAEL013989  | 1 to 1         | <i>sec61β</i>  | T T T A C G T T A A<br>C T T A C G T G G T<br>A T T A C G T G G A<br>A T T A C G T G A G                        | For<br>For<br>Rev<br>Rev        | 500-2000 bp<br>500-2000 bp<br><500 bp<br>500-2000 bp            |
| FBgn0010391  | AAEL005856  | 1 to 1         | <i>Gtp-bp</i>  | C T G A C G T T A T<br>G T G A C G T T T A                                                                      | For<br>For                      | 500-2000 bp<br><500 bp                                          |
| FBgn0011584  | AAEL010538  | 1 to many      | <i>Trp1</i>    | T T G A C G T T T T<br>G G T A C G T T T T                                                                      | For<br>Rev                      | 500-2000 bp<br><500 bp                                          |
| FBgn0011584  | AAEL013226  | 1 to many      | <i>Trp1</i>    | T T T A C G T T T A                                                                                             | Rev                             | <500 bp                                                         |
| FBgn0015298  | AAEL004914  | 1 to 1         | <i>srp19</i>   | T T G A C G T T A T                                                                                             | For                             | <500 bp                                                         |
| FBgn0021795  | AAEL013320  | 1 to 1         | <i>Tapδ</i>    | T G G A C G T G G C<br>T T G A C G T T C G                                                                      | For<br>Rev                      | <100 bp<br><100 bp                                              |
| FBgn0022268  | AAEL008434  | 1 to many      | <i>KdelR</i>   | C T G A C G T G T A                                                                                             | For                             | 500-2000 bp                                                     |
| FBgn0022268  | AAEL002086  | 1 to many      | <i>KdelR</i>   | C T G A C G T G T A<br>C T G A C G T G T G<br>T T G A C G T T T G<br>T T T A C G T G G C                        | For<br>For<br>Rev<br>Rev        | 500-2000 bp<br>500-2000 bp<br>500-2000 bp<br>500-2000 bp        |
| FBgn0028969  | AAEL013230  | 1 to 1         | <i>δCOP</i>    | T C G A C G T G A T<br>C T G A C G T G T G<br>T T G A C G T T T C<br>G T G A C G T T T G<br>A C G A C G T G T G | For<br>Rev<br>Rev<br>Rev<br>Rev | 500-2000 bp<br><100 bp<br>500-2000 bp<br><100 bp<br>500-2000 bp |
| FBgn0030341  | AAEL011755  | 1 to 1         | <i>p24-1</i>   | T T G A C G T T T G                                                                                             | For                             | <500 bp                                                         |
| FBgn0040340  | AAEL003285  | 1 to 1         | <i>TRAM</i>    | G G G A C G T A T G<br>A G A A C G T G T T                                                                      | For<br>Rev                      | 500-2000 bp<br>500-2000 bp                                      |
| FBgn0040512  | AAEL013121  | 1 to 1         | <i>ζCOP</i>    | C G G A C G T G A A<br>T T G A C G T T A A<br>A T G A C G T T T C                                               | For<br>Rev<br>Rev               | 500-2000 bp<br>500-2000 bp<br>500-2000 bp                       |
| FBgn0053105  | AAEL000410  | 1 to many      | <i>p24-2</i>   | C C G A C G T G T T<br>T C T A C G T G T G                                                                      | Rev<br>Rev                      | 500-2000 bp<br>500-2000 bp                                      |
| FBgn0033339  | AAEL001516  | 1 to 1         | <i>sec31</i>   | A T T A C G T T C C                                                                                             | For                             | <500 bp                                                         |
| FBgn0010348  | AAEL007065  | 1 to 1         | <i>arf79F</i>  | T C T A C G T G G G<br>G T T A C G T T G C<br>G C T A C G T T T G                                               | For<br>Rev<br>Rev               | 500-2000 bp<br><200 bp<br><500 bp                               |
| FBgn0035771  | AAEL007987  | 1 to 1         | <i>sec63</i>   | G C G A C G T T T A                                                                                             | Rev                             | <200 bp                                                         |

*Ae. aegypti* orthologs of *D. melanogaster* secretory genes were identified. The associated gene identification numbers, orthology relationships, and gene names are provided. A 2 kb region immediately upstream of the open reading frame (ORF) of each *Ae. aegypti* secretory pathway gene ortholog was searched for sequences corresponding to the CRE-binding site consensus motif (Abrams and Andrew, 2005). The identified sequences and their locations with respect to the open reading frame (ORF) of each *Ae. aegypti* gene are indicated.
